# Supplementary material for: KDM2B Is Implicated in Bovine Lethal Multi-Organic Developmental Dysplasia
Source: PubMed Central journal article supplement (PMC3459949; doi:10.1371/journal.pone.0045634), 2012-09-27

**A**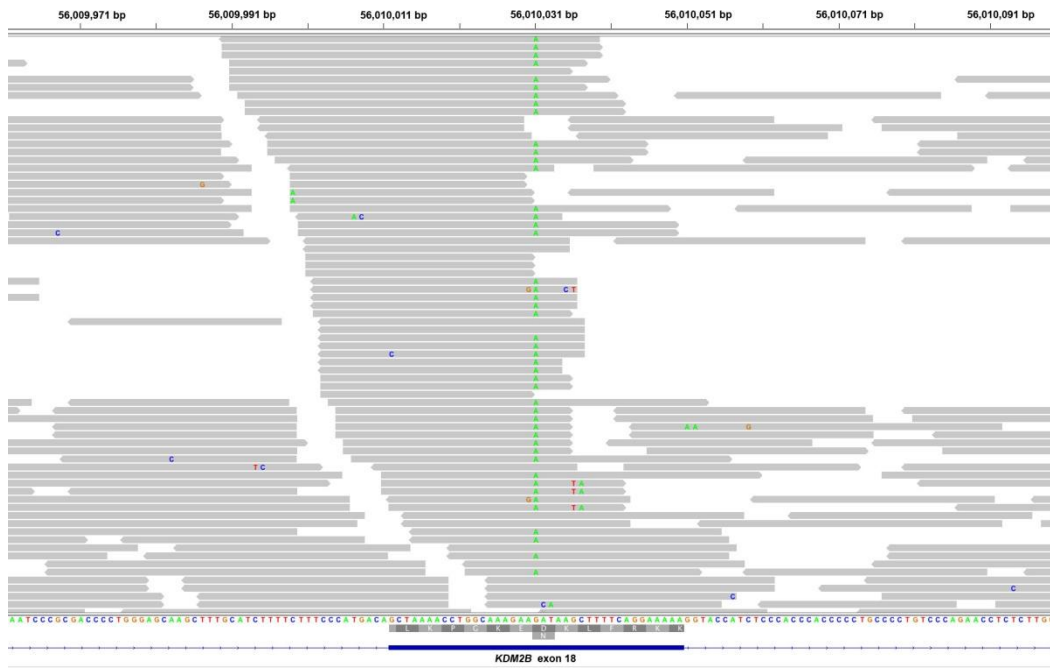**B**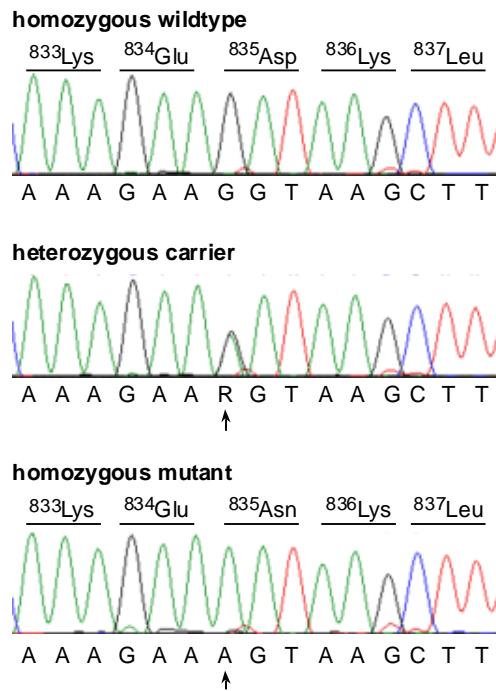

Supplement: pone.0045634.s002.pdf [file pone.0045634.s002.pdf]
